# Supplementary material
Source: publisher figshare collection journal article supplement (https://karger.figshare.com/ndownloader/files/13310231)
Supplement: Supplementary file 1 [file 13310231]

**Appendix**

**Acknowledgments**

This research was supported by the Ministry of Trade, Industry & Energy(MOTIE, Korea) under the Industrial Technology Innovation Program. No. 10062378.

**Conflict of Interest**

The authors have no conflict of interest to report.
